# Supplementary material for: Nanoengineering of gold nanoribbon-embedded isogenic stem cell-derived cardiac organoids
Source: Royal Society of Chemistry journal article supplement (doi:10.1039/d3ra01811c), 2023-01-01
Supplement: d3ra01811c1.pdf [file d3ra01811c1.pdf]

**Figures**

Figure S1. Diameter track of cardiac organoids

Figure S2. Cardiac organoids after harvesting

**Videos**

Video S1. Cardiac organoids after harvesting (Mono-culture, 0 $\mu$ g/ml)

Video S2. Cardiac organoids after harvesting (Mono-culture, 0 $\mu$ g/ml)

Video S3. Cardiac organoids after harvesting (Mono-culture, 0 $\mu$ g/ml)

Video S4. Cardiac organoids after harvesting (Mono-culture, 0 $\mu$ g/ml)

**Tables**

Table S1. Table of resources

Table S2. qRT-PCR Primer sequences
