# Supplementary material for: Nanoengineering of gold nanoribbon-embedded isogenic stem cell-derived cardiac organoids
Source: Royal Society of Chemistry journal article supplement (doi:10.1039/d3ra01811c), 2023-01-01
Supplement: d3ra01811c3.pdf [file d3ra01811c3.pdf]

A)

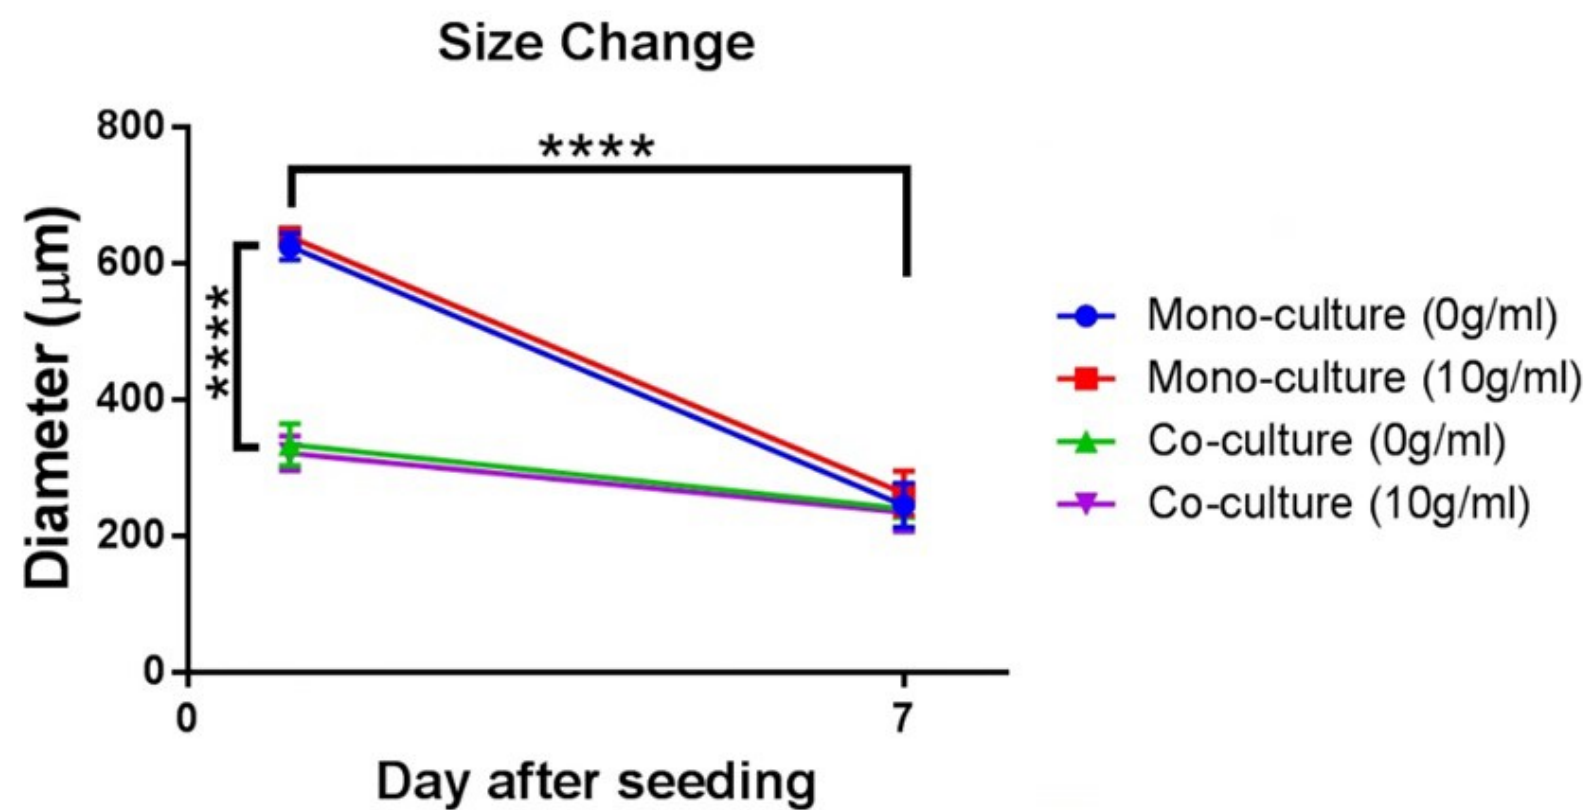

B)

|       |                           | Mono-culture       |                     | Co-culture         |                     |
|-------|---------------------------|--------------------|---------------------|--------------------|---------------------|
|       |                           | 0 $\mu\text{g/ml}$ | 10 $\mu\text{g/ml}$ | 0 $\mu\text{g/ml}$ | 10 $\mu\text{g/ml}$ |
| Day 1 | Mean ( $\mu\text{m}$ )    | 624.062            | 638.090             | 333.667            | 321.129             |
|       | Std Dev ( $\mu\text{m}$ ) | 34.513             | 26.240              | 53.569             | 43.885              |
| Day 7 | Mean ( $\mu\text{m}$ )    | 244.642            | 262.296             | 239.559            | 234.593             |
|       | Std Dev ( $\mu\text{m}$ ) | 56.569             | 56.429              | 46.300             | 49.232              |
