# Supplementary figures and images for: Nanoengineering of gold nanoribbon-embedded isogenic stem cell-derived cardiac organoids
Source: Royal Society of Chemistry journal article supplement (doi:10.1039/d3ra01811c), 2023-01-01

**Monoculture, 0 $\mu$ g/ml**

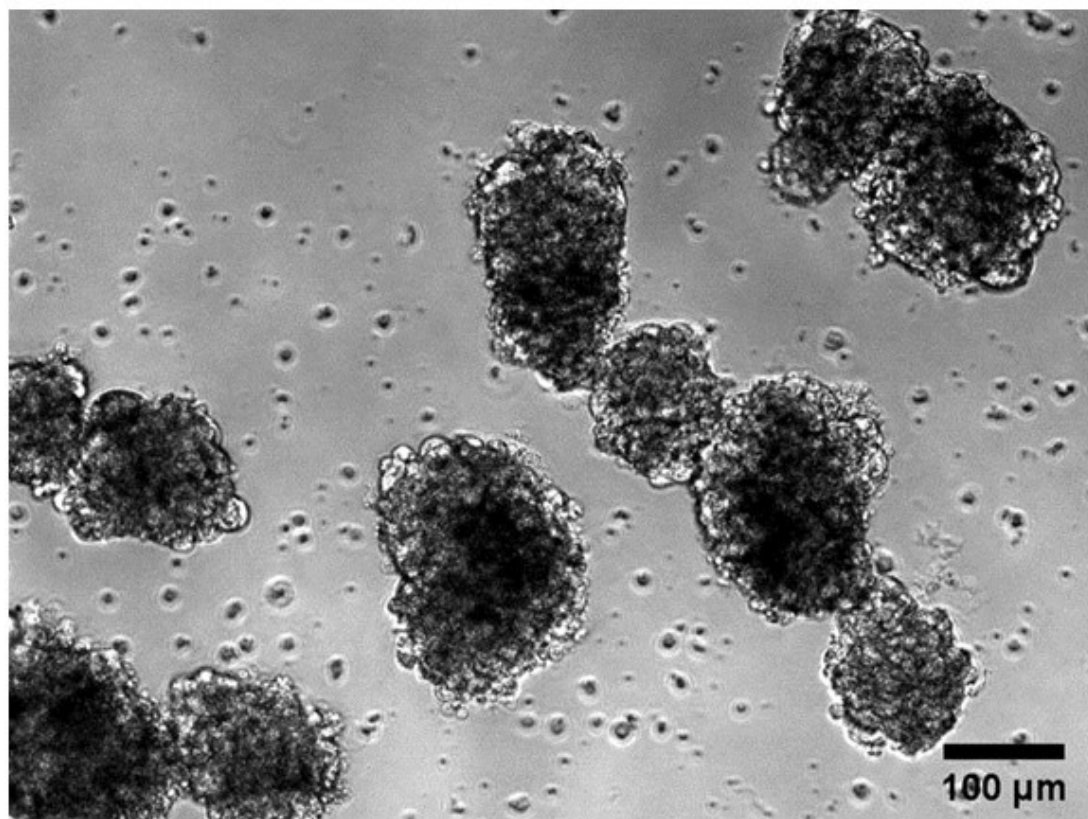

**Monoculture, 10 $\mu$ g/ml**

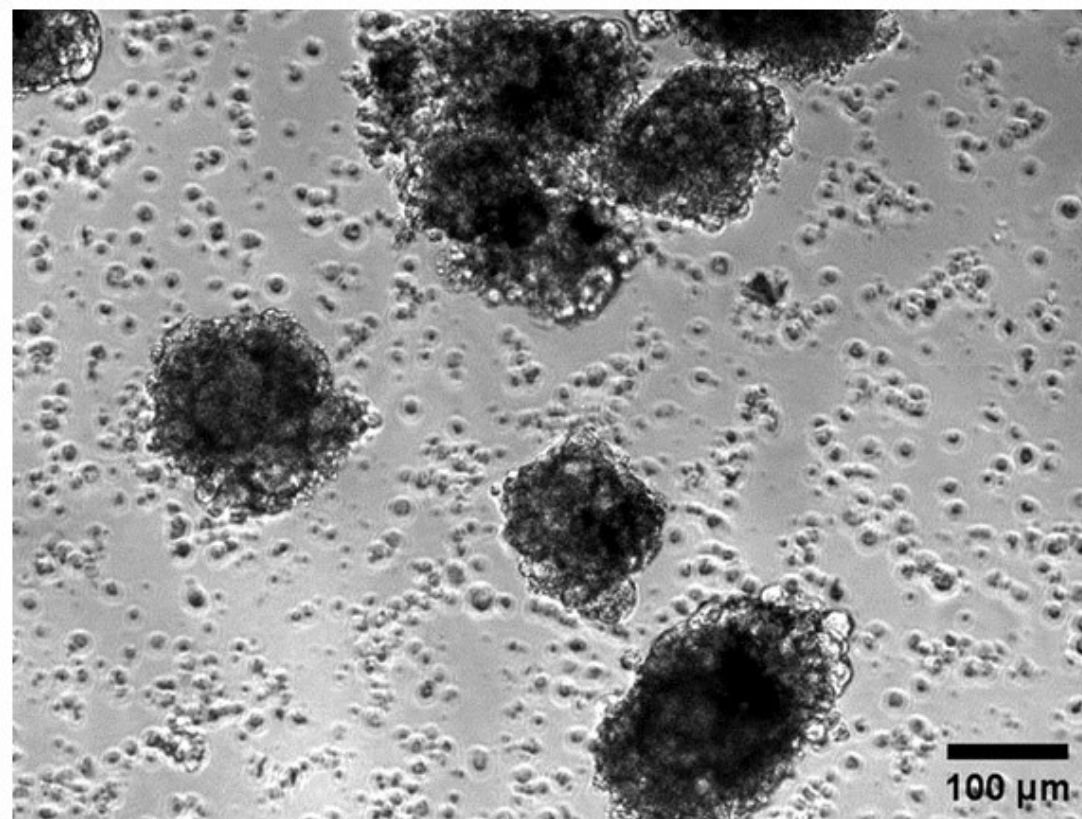

**Coculture, 0 $\mu$ g/ml**

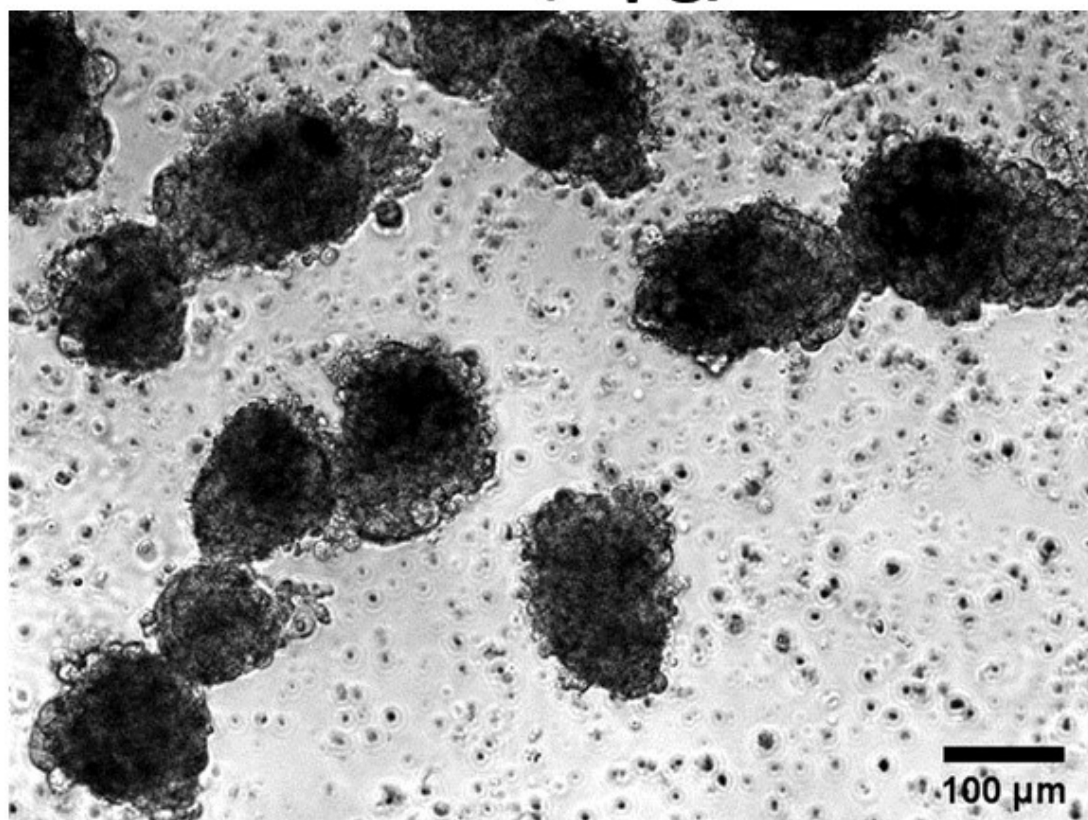

**Coculture, 10 $\mu$ g/ml**

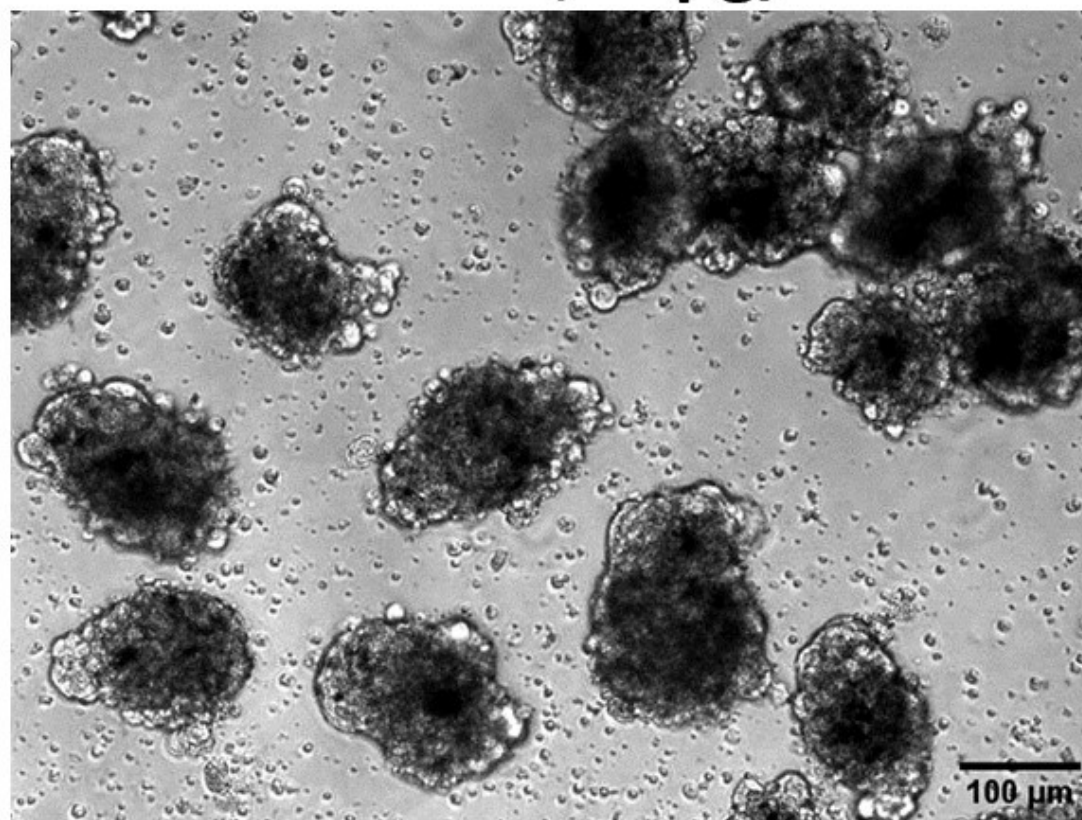

Supplement: d3ra01811c4.pdf [file d3ra01811c4.pdf]
